# Supplementary material for: LoDEI: a robust and sensitive tool to detect transcriptome-wide differential A-to-I editing in RNA-seq data
Source: PubMed Central journal article supplement (PMC11500352; doi:10.1038/s41467-024-53298-y), 2024-10-23
Supplement: 41467_2024_53298_MOESM1_ESM.pdf [file 41467_2024_53298_MOESM1_ESM.pdf]

1

Supplementary Information for

2

3

4

**LoDEI: a robust and sensitive tool to detect  
transcriptome-wide differential A-to-I editing in  
RNA-seq data**

5

6

Phillipp Torkler, Marina Sauer, Uwe Schwartz, Selim Corbacioglu, Gunhild Sommer,  
Tilman Heise

|    |                                                                                 |           |
|----|---------------------------------------------------------------------------------|-----------|
| 7  | <b>Contents</b>                                                                 |           |
| 8  | <b>List of Supplementary Figures</b>                                            | <b>ii</b> |
| 9  | <b>List of Supplementary Tables</b>                                             | <b>ii</b> |
| 10 | <b>1 C. elegans analysis</b>                                                    | <b>8</b>  |
| 11 | <b>2 Comparison of single samples</b>                                           | <b>9</b>  |
| 12 | <b>3 Implications of a window-based differential A-to-I editing calculation</b> | <b>11</b> |
| 13 | <b>4 Supplementary Tables</b>                                                   | <b>13</b> |
| 14 | <b>References</b>                                                               | <b>15</b> |

15 **List of Supplementary Figures**

16 1 Manual validation of differential A-to-I editing as detected by LoDEI in  
17 MYCN-amp cells . . . . . 1  
18 2 Manual validation of differential A-to-I editing as detected by LoDEI in  
19 *sncRNA7SL* cells . . . . . 1  
20 3 Alu Editing Index . . . . . 2  
21 4 Distributions of the average number of A-to-I positions per window . . . . 2  
22 5 Upset-like plot for the comparison of detected windows and sites . . . . . 3  
23 6 Distributions of  $\delta^{A \rightarrow G}$  values in the ADAR KD dataset . . . . . 3  
24 7 Impact of the window size on the number of detected windows . . . . . 4  
25 8 Empirical  $q$  values and absolute number of detected windows . . . . . 5  
26 9 Manual validation of differential A-to-I editing as detected by LoDEI in  
27 the RO60 KO dataset . . . . . 6  
28 10 Manual validation of differential A-to-I editing as detected by LoDEI in  
29 the MYCN dataset . . . . . 7  
30 11 Overlap of genomic positions of LoDEI windows with different window sizes 7  
31 12 Observed signal differences and empirically derived  $q$  values . . . . . 8  
32 13 Differential A-to-I site performance comparison in *C. elegans* datasets . . 9  
33 14 Distributions of the average number of A-to-I positions per window in the  
34 *C. elegans* datasets . . . . . 9  
35 15 Pairwise comparison naming scheme . . . . . 10  
36 16 Jaccard indices of detected differential A-to-I editing obtained from single  
37 sample comparisons by LoDEI . . . . . 11  
38 17 Implications of a window-based differential A-to-I editing detection . . . . 12

39 **List of Supplementary Tables**

40 1 LoDEI results for all possible mismatches for all analyzed datasets . . . . 13  
41 2 DESeq2 results for genes of the ADAR family . . . . . 14

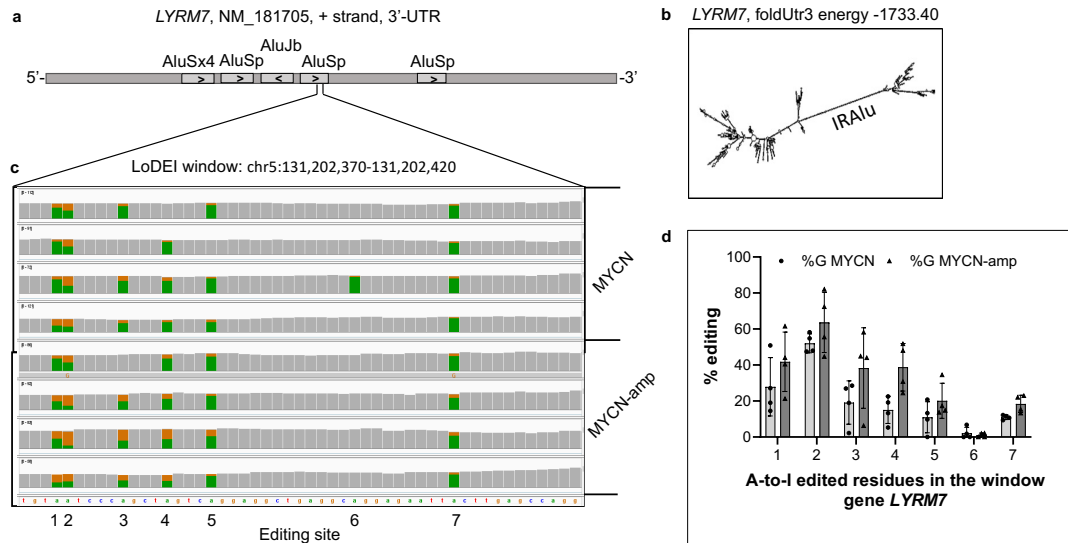

**Supplementary Figure 1: Manual validation of differential A-to-I editing as detected by LoDEI.** **a**, Scheme of the LYRM7 3'-UTR with five Alu elements. **b**, Predicted folding of the 3'-UTR and a long dsRNA IRAlu. **c**, IGV browser screen-shot of a LoDEI window with A-to-I editing sites (green A, orange G). **d**, Quantification of A-to-I editing shows a trend to more editing in MYCN-amp cells (n=8)

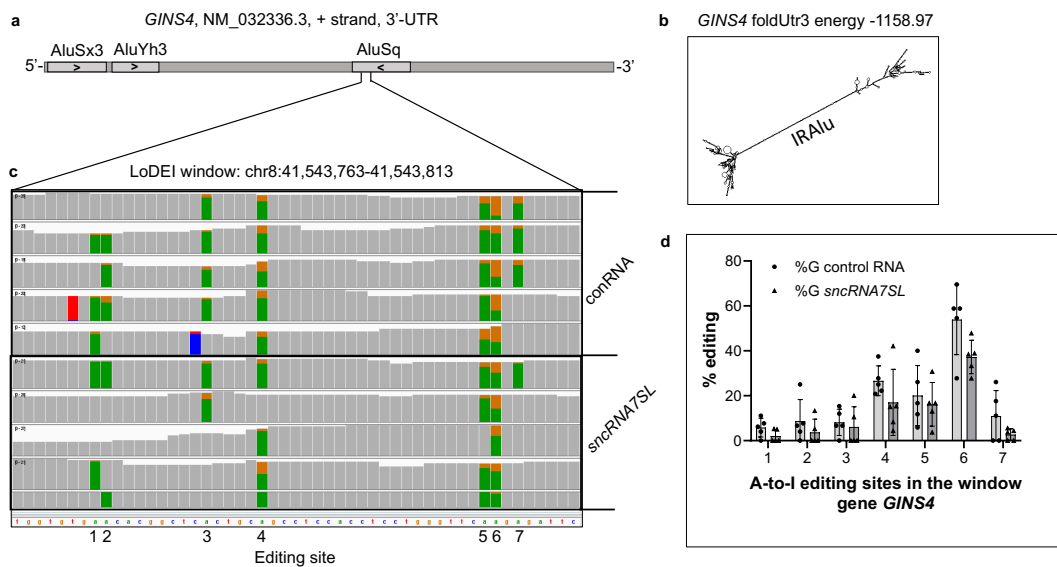

**Supplementary Figure 2: Manual validation of differential A-to-I editing as detected by LoDEI.** **a**, Scheme of the GINS4 3'-UTR with three Alu elements. **b**, Predicted folding of the 3'-UTR and the long dsRNA IRAlu. **c**, IGV screen-shot of a LoDEI window with A-to-I editing sites (green A, orange G). **d**, Quantification of A-to-I editing shows a trend to less editing in snRNA7SL OE cells (n=10).

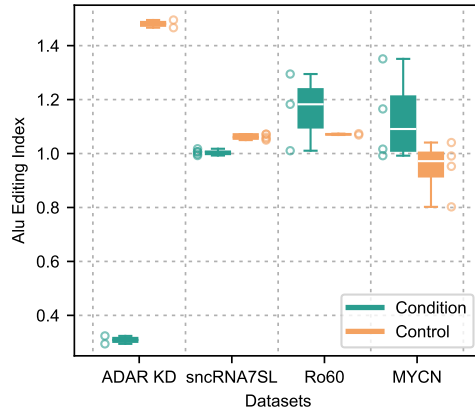

**Supplementary Figure 3: Alu Editing Index.** Individual AEI values for each sample are shown for the condition and control sets for all datasets. Boxplots are computed from individual AEI values. Condition refers to ADAR1 KD, *sncRNA7SL* OE, RO60 KO and MYCN-amp samples.

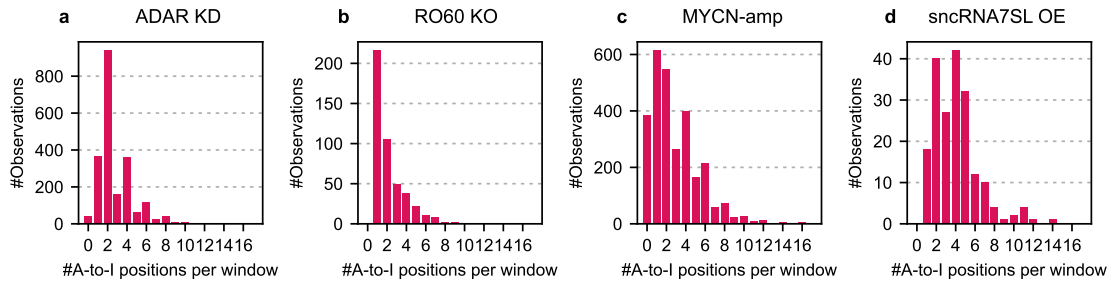

**Supplementary Figure 4: Distributions of the average number of A-to-I positions per window.** Shown are the average number of A-to-I sites within detected differential A-to-I windows by LoDEI in the ADAR KD (a), RO60 KO (b), MYCN-amp (c) and *sncRNA7SL* (d) datasets.

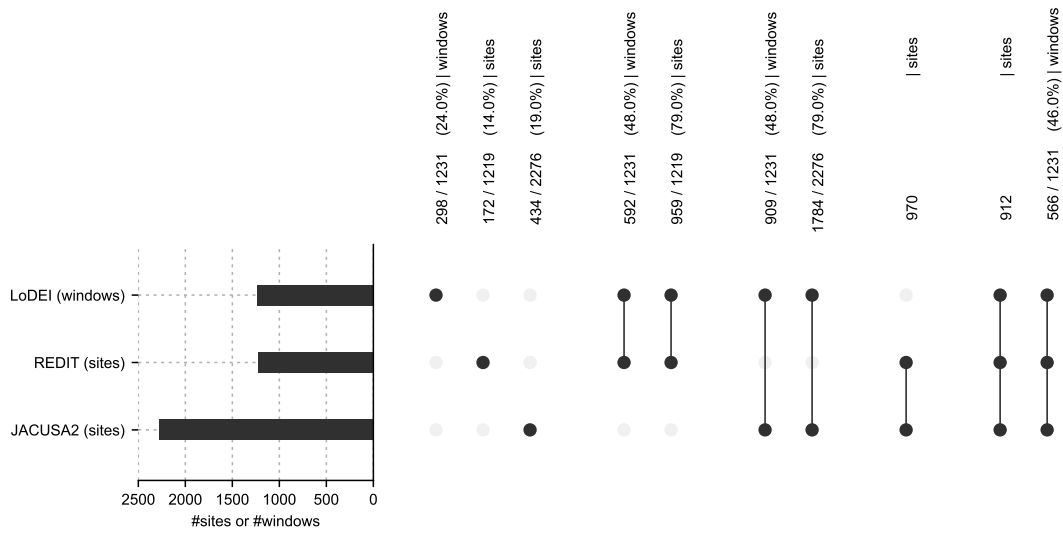

**Supplementary Figure 5: UpSet-like plot for the comparison of detected windows and sites.** UpSet plots visualize the intersections and relationships between sets [2]. The total number of detected differential A-to-I windows (LoDEI) or differential A-to-I sites (REDIT, JACUSA2) in the ADAR KD dataset for a  $q$  value threshold  $\leq 0.05$  are shown in the horizontal bar plot on the left. Intersections are visualized by dots. A single dot represents differential A-to-I windows or sites that are unique for each of the methods. Connected dots symbolize intersection of sets. Note, since LoDEI detects windows and not single sites, the intersections between LoDEI and any other tool must be made from the perspective of windows and sites. Thus, two intersections are given per comparison.

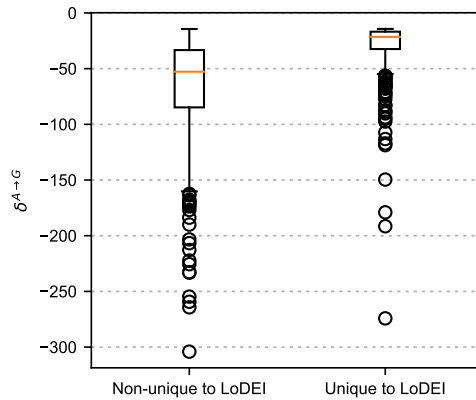

**Supplementary Figure 6: Distributions of  $\delta^{A \rightarrow G}$  values in the ADAR KD dataset.** The ADAR KD dataset is the only dataset where all methods detected differential A-to-I editing. The distribution of LoDEI's  $\delta^{A \rightarrow G}$  values are shown for windows exclusively detected by LoDEI (right) and for windows that overlap with sites detected by REDIT and/or JACUSA2 (left).

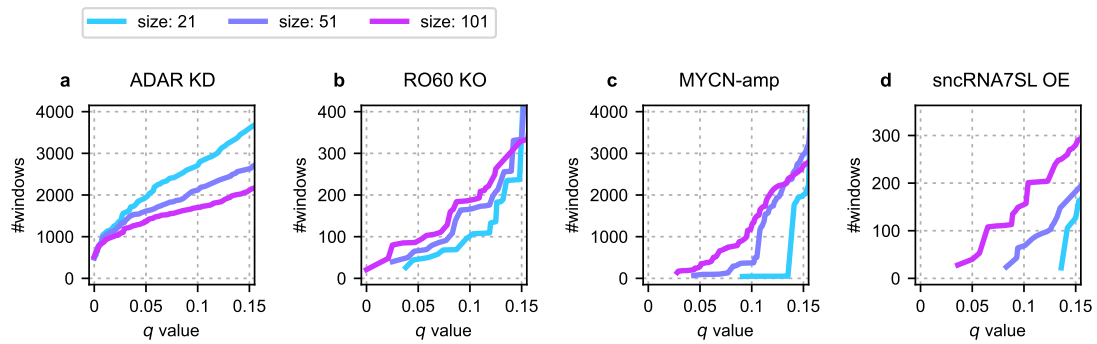

**Supplementary Figure 7: Impact of the window size on the number of detected windows.** The number of detected differential A-to-I windows as a function of the  $q$  value threshold is shown for the window sizes of 21nt, 51nt, and 101nt for the ADAR KD (a), RO60 KO (b), MYCN-amp (c) and *snRNA7SL* (d) datasets.

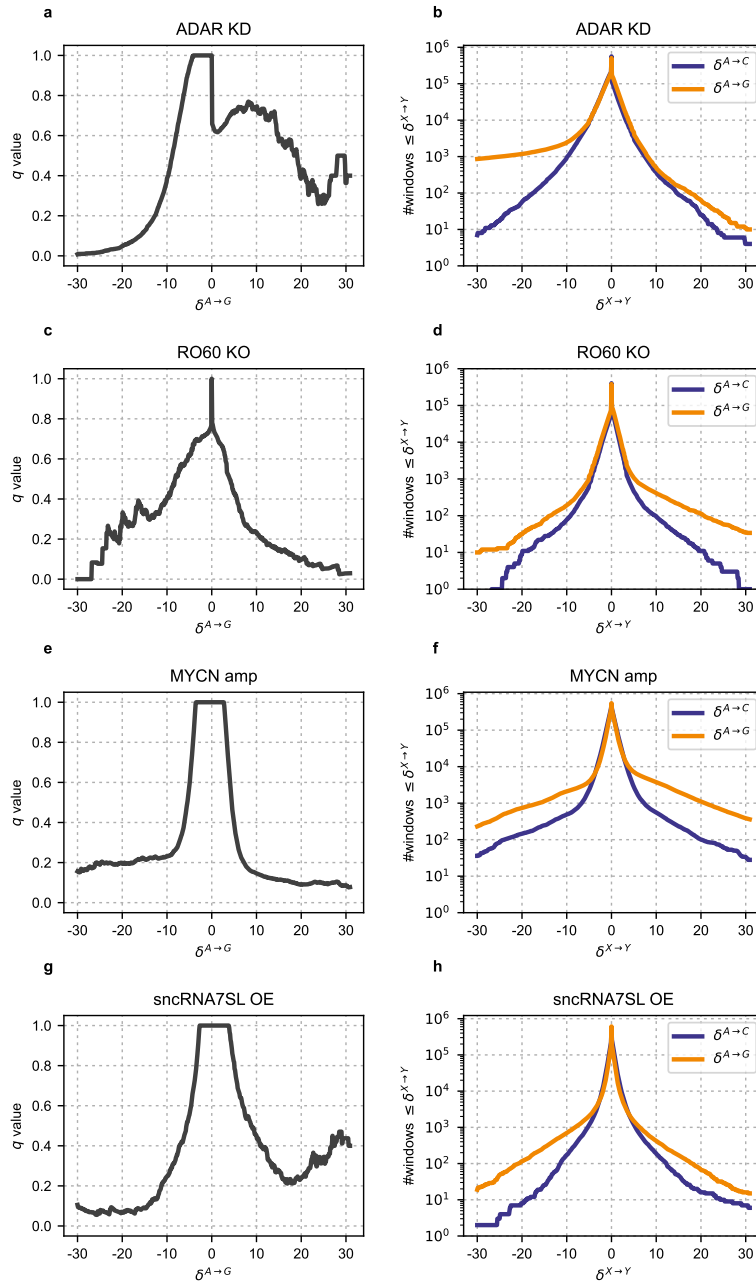

**Supplementary Figure 8: Empirical  $q$  values and absolute number of detected windows.** Empirical  $q$  values for  $\delta^{A \rightarrow G}$  windows are shown based exclusively using  $\delta^{A \rightarrow C}$  for the approximation of the number of false positives for the ADAR KD (a), RO60 KO (c), MYCN-amp (e) and *sncRNA7SL* (g) datasets. The absolute number of detected  $\delta^{A \rightarrow G}$  and  $\delta^{A \rightarrow C}$  are shown in (b), (d), (f), and (h). The stronger the  $\delta$  signals, the less the number of available windows that can be used for the  $q$  value estimation causing a higher variance in the  $q$  value estimates. The higher variance can result in increasing  $q$  values against the overall trend of decreasing  $q$  values (e.g.  $q$  values in the RO60 KO dataset within the range of 15-30 of the  $\delta^{A \rightarrow G}$  values).



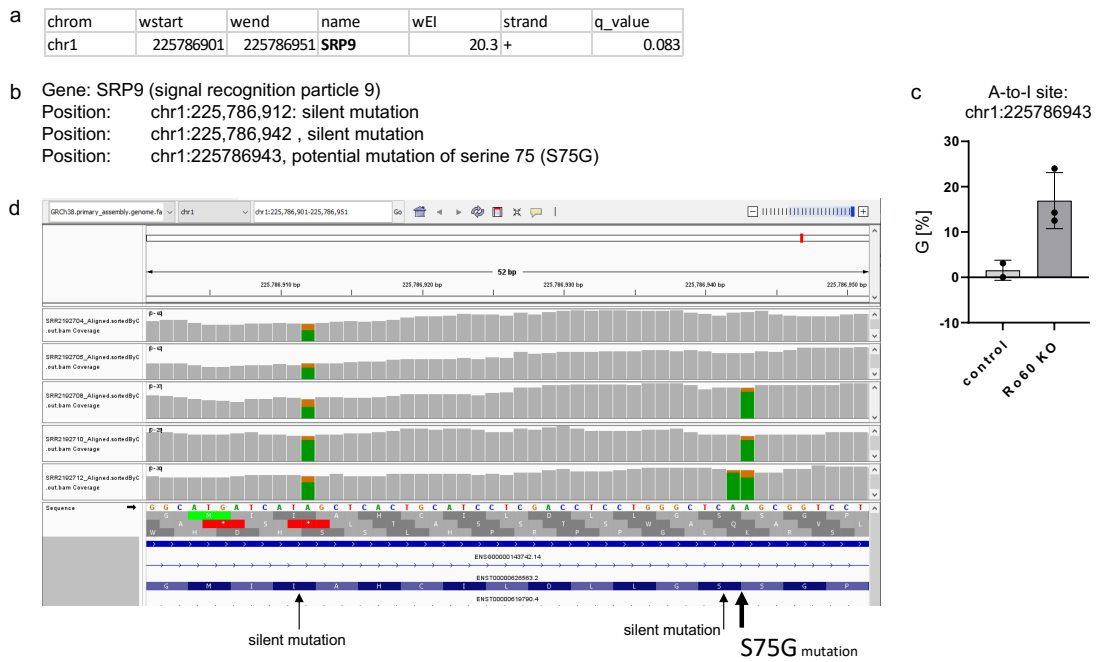

**Supplementary Figure 9: Manual validation of differential A-to-I editing as detected by LoDEI in the RO60 KO dataset.** a) LoDEI information, b) Differentially edited sites, c) Percent differential A-to-I editing frequency. In control cells about 1.6% ( $n = 2$ ) of sites are edited whereas in RO60 17% ( $n = 3$ ) of the sites are edited. d) IGV browser screen-shot of a LoDEI window chr1:225,786,901-chr1:225,786,951. Three differentially edited sites are indicated (arrows). The bold arrow indicates a potential S75G mutation.

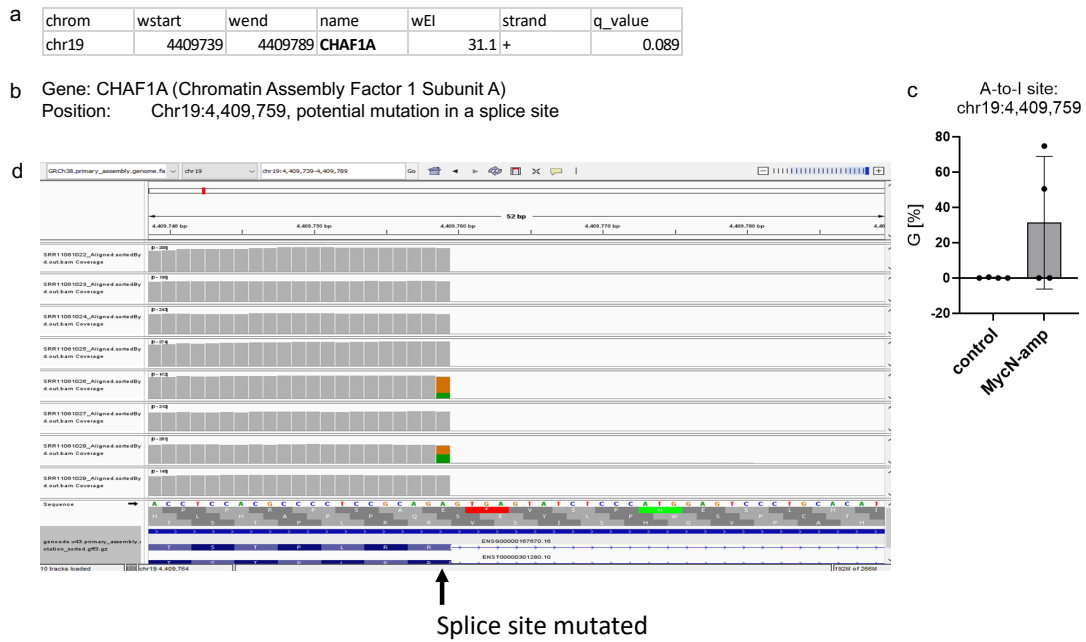

**Supplementary Figure 10: Manual validation of differential A-to-I editing as detected by LoDEI in the MYCN dataset.** a) LoDEI information, b) Differentially edited sites, c) Average percent differential A-to-I editing frequency. In control cells about 0.6% ( $n = 4$ ) of sites are edited whereas in MYCN-amp cells 31% ( $n = 4$ ) of the sites are edited. d) IGV browser screen-shot of a LoDEI window chr19:4,409,739 – chr19:4,409,789 One differentially edited site is indicated. The bold arrow indicates the potential mutated splice site. This differential A-to-I editing site is not found in REDIPortal.

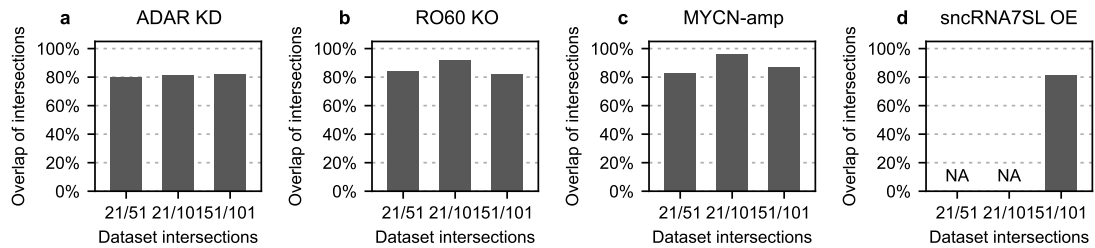

**Supplementary Figure 11: Overlap of genomic positions of LoDEI windows with different window sizes.** LoDEI was run with different window sizes (Supplementary Fig. 7). Here, the percent of overlap of the results of smaller windows with the results of larger windows for a  $q$  value threshold  $\leq 0.1$  are shown. Results obtained with a window size of 21 are compared against the results of window sizes of 51 (21/51) and 101 (21/101), and the results obtained with a window size of 51 are compared with results of the window size 101 (51/101). All overlaps are  $\geq 80\%$ .

## 42 1 C. elegans analysis

43 To further support the general applicability of LoDEI we performed the same analysis as  
 44 in the main manuscript to previously published *C. elegans* data [1]. Wildtype *C. elegans*  
 45 N2 RNA-seq data is compared against RNA-seq data from ADAR mutant strains in the  
 46 embryo and L4 stage of the worm development. Similar to the findings in the human  
 47 ADAR KD dataset, a strong contrast between  $A \rightarrow G$  and non- $A \rightarrow G$  differences can be  
 48 observed (Supplementary Fig. 12a vs. 12b and 12d vs. 12e; Fig. 2a vs. 2b). Non- $A \rightarrow G$   
 49 differences show a different pattern compared to the  $A \rightarrow G$  signals. Strong  $\delta$  values  
 50 are exclusively detected in the  $A \rightarrow G$  signals and do not appear in the background  
 51 non- $A \rightarrow G$  signals, supporting the general applicability of LoDEI's approach to detect  
 52 signals caused by A-to-I editing.

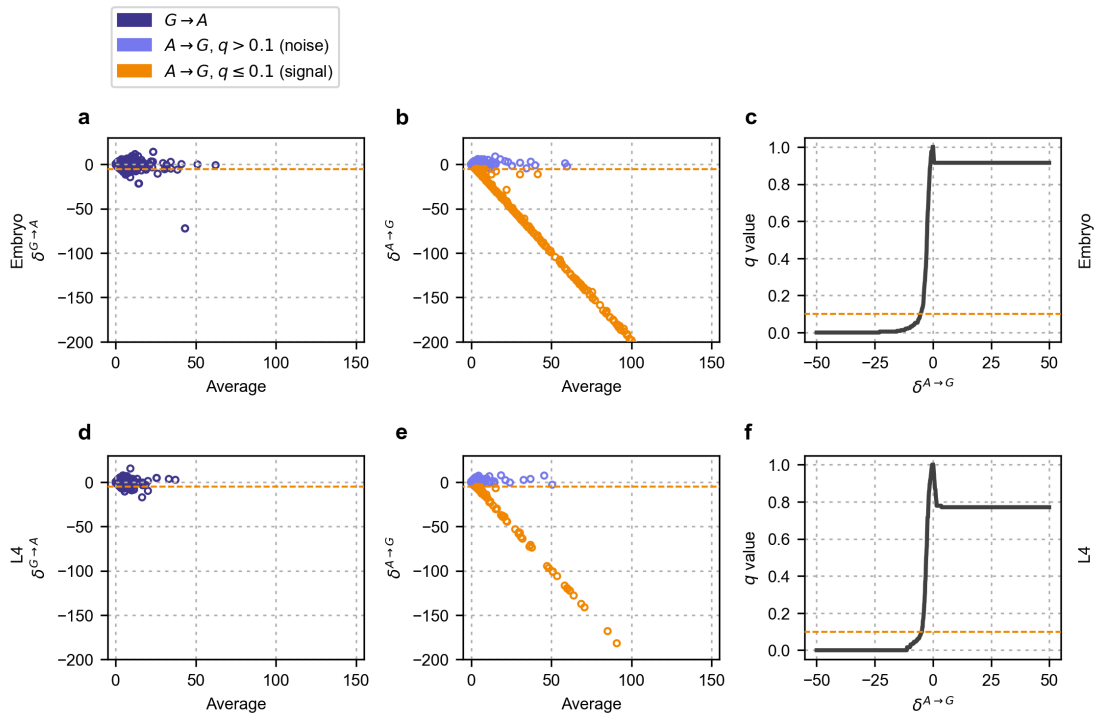

**Supplementary Figure 12: Observed signal differences and empirically derived  $q$  values.** Rows show the comparison of wildtype and ADAR mutant strains for the *C. elegans* embryo (a, b, c) and for the *C. elegans* L4 stage (d, e, f). The left column (a, d) shows Bland-Altman plots for  $\delta^{G \rightarrow A}$  values representing the observed noise. The second column (b, e) shows Bland-Altman plots for  $\delta^{A \rightarrow G}$  values which are a mixture of A-to-I editing signals and noise. Highlighted orange dots have an empirical  $q$  value  $\leq 0.1$ . No strong  $\delta$  values can be observed in the non- $A \rightarrow G$  comparison (left column) in contrast to the middle column. The right column shows empirically derived  $q$  values as a function of the  $\delta$  signal.

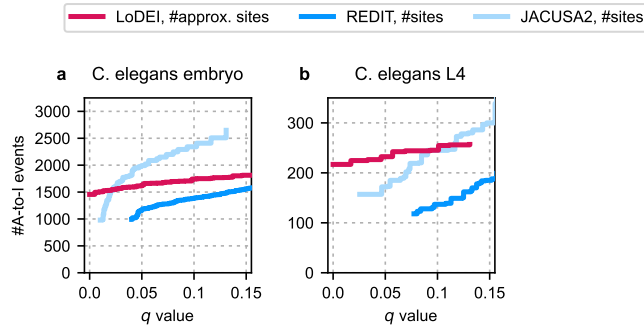

**Supplementary Figure 13: Differential A-to-I site performance comparison in *C. elegans* datasets.** The number of detected differential A-to-I sites is shown as a function of the  $q$  values threshold for the *C. elegans* embryo (a) and *C. elegans* L4 datasets (b).

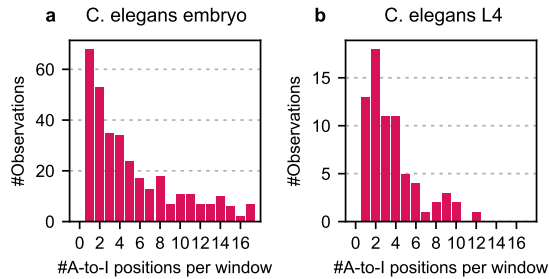

**Supplementary Figure 14: Distributions of the average number of A-to-I positions per window in the *C. elegans* datasets.** Shown are the average number of A-to-I sites within detected differential A-to-I windows by LoDEI in the *C. elegans* embryo (a) and *C. elegans* L4 datasets (b).

## 53 2 Comparison of single samples

54 To test if LoDEI might be able to detect differential A-to-I editing between single samples,  
 55 we first generated results using LoDEI for each pairwise comparison between individual  
 56 samples of sets  $S$  and  $S'$ . When naming individual samples only by their numeric  
 57 index starting at 0, we can use the numeric indices of both samples to indicate which  
 58 samples were used to generate the results. For instance, '01' is the name of the LoDEI  
 59 result of the comparison of sample  $s_0$  from set  $S$  with sample  $s_1$  from set  $S'$  (Supple-  
 60 mentary Fig. 15). We use this naming scheme in Supplementary Fig. 16.

61 To compare the detected differential A-to-I editing obtained from the pairwise compar-  
 62 isons, we used the Jaccard index. The Jaccard index  $J(A, B)$  measures the similarity  
 63 of two sets  $A$  and  $B$  by dividing the intersection of  $A$  and  $B$  by the union of  $A$  and  $B$ :

$$J(A, B) = \frac{A \cap B}{A \cup B} \quad (1)$$

64 Since LoDEI reports windows and not single positions, we first generated a list of  
 65 all genomic positions covered by the reported windows which yields the sets  $A$  and  $B$ .

|   |    |    |    |
|---|----|----|----|
| 0 | 00 | 01 | 02 |
| 1 | 10 | 11 | 12 |
| 2 | 20 | 21 | 22 |
|   | 0  | 1  | 2  |

Sample Indices Set  $S'$

**Supplementary Figure 15: Pairwise comparison naming scheme.** To analyze the ability to detect differential A-to-I editing between single samples we first generated results using LoDEI for each pairwise comparison of the samples of the different sets. The entries in the matrix show the resulting names for a pairwise comparison. For instance, '01' is the name of the LoDEI result of the comparison of sample  $s_0$  from set  $S$  with sample  $s_1$  from set  $S'$ . This naming scheme is used in Supplementary Fig. 16

66 The generation of these lists is necessary to calculate a precise Jaccard index. Without  
 67 transforming the windows into single positions, it would be questionable what an overlap  
 68 between two windows is. For instance, an overlap of two windows by only a single position  
 69 could be considered as an overlap of the results which could yield a larger overlap. To  
 70 avoid such a potential bias and report a position-specific comparison of overlaps of  
 71 windows, we first generate a list of the covered genomic positions and calculate the  
 72 Jaccard index based on those genomic positions (Supplementary Fig. 16).

73 A detection of differential A-to-I editing detection based on the comparison of single  
 74 samples could only be achieved in the ADAR KD and RO60 datasets where a strong  
 75 difference in A-to-I editing is known.

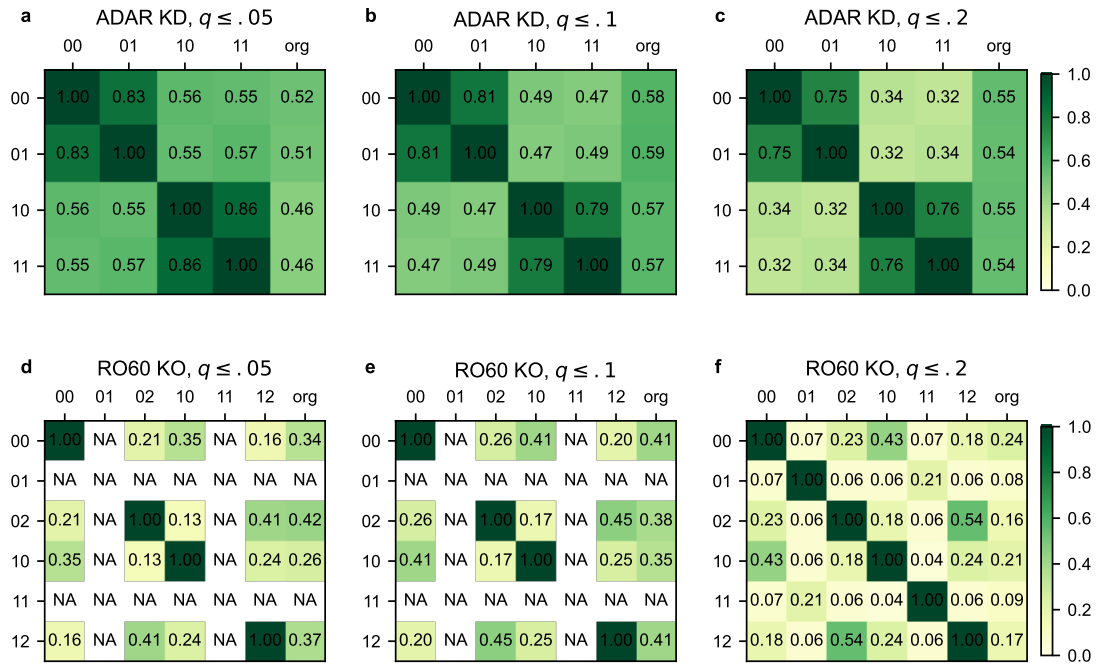

**Supplementary Figure 16: Jaccard indices of detected differential A-to-I editing obtained from single sample comparisons by LoDEI.** The Jaccard indices are shown between results from single sample comparisons. The 'org' column is the Jaccard index of a result of a single sample comparison with the result of the original result where the sets containing all samples were compared against each other. NA entries are caused if no windows with a  $q$  values  $\leq 0.1$  could be detected in the single sample comparisons.

### 3 Implications of a window-based differential A-to-I editing calculation

Three artificial scenarios are shown in Supplementary Fig. 17 a), b), and c), to help indicating the implications of window-based approaches in comparison to a site-specific detection approaches. In all scenarios, the samples  $s_1, s_2, s_3$  belong to set  $S$  and the samples  $s_4, s_5, s_6$  belong to set  $S'$ . Each scenario shows three adenosines within a single window. The shown adenosines are not required to be consecutive, but need to be anywhere within a window.

Scenario a) shows an example for a site-specific A-to-I editing event. Tools like REDIT and JACUSA2 were developed to detect this kind of signal. Since LoDEI first sums up the individual signals per sample in a window and then averages across these sums, individual editing events are also detected by the window-based approach used by LoDEI as shown by the intersection analysis in the results part of the main manuscript and Supplementary Fig. 5.

In scenario b), again one adenosine is edited per sample in set  $S$  like in scenario a), but here the editing takes place at different positions instead of the same position like

92 in scenario a). Site-specific tools like REDIT and JACUSA2 do not detect this scenario,  
 93 since their statistical models require sufficient support of editing at the same position.  
 94 In contrast, window-based approaches do not require a position specific editing and  
 95 call a window being differential as long as there is a difference between the windows  
 96 independent of the positions in the samples.

97 Since the differential editing is not position-specific in a window-based approach, no  
 98 differential editing would be detected in scenario c) in a window-based approach. The  
 99 overall editing per sample is identical for all samples. A position-specific approach would  
 100 detect all 3 positions of being differentially edited, whereas position 1 and 3 would be  
 101 stronger edited in  $S'$  and position 2 would be stronger edited in  $S$ .

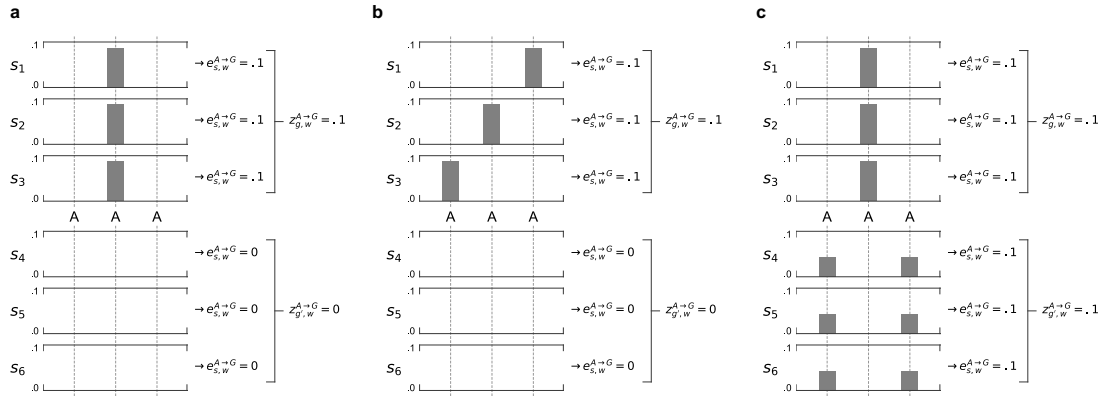

**Supplementary Figure 17: Implications of a window-based differential A-to-I editing detection.** Three artificial scenarios are shown to indicate the implications of a window-based detection approach. Samples  $s_1, \dots, s_3$  belong to set  $S$  and samples  $s_4, \dots, s_5$  belong to set  $S'$ . Scenario a) represents a site-specific editing event that can be detected by window-based and site-specific approaches. In scenario b) one adenosine is edited per sample in set  $S$ , but at different positions. Here, site-specific models do not detect differential editing in contrast to a window-based approach. In scenario c) window based approaches do not identify the shown positions as differentially edited, since the overall editing is identical per window. In contrast, site specific approaches would detect 3 differentially edited positions, whereas position 1 and 3 would be stronger edited in  $S'$  and position 2 would be stronger edited in  $S$ .

## 4 Supplementary Tables

| Editing             | Cutoff<br>Negative | Cutoff<br>Positive | LoDEI<br>#- | LoDEI<br>#+ |
|---------------------|--------------------|--------------------|-------------|-------------|
| ADAR1 KD            |                    |                    |             |             |
| AC                  | -inf               | inf                | 0           | 0           |
| AG                  | -11.1              | inf                | 1624        | 0           |
| AT                  | -inf               | inf                | 0           | 0           |
| CA                  | -inf               | inf                | 0           | 0           |
| CG                  | -inf               | inf                | 0           | 0           |
| CT                  | -inf               | inf                | 0           | 0           |
| GA                  | -inf               | inf                | 0           | 0           |
| GC                  | -inf               | inf                | 0           | 0           |
| GT                  | -inf               | inf                | 0           | 0           |
| TA                  | -inf               | inf                | 0           | 0           |
| TC                  | -21.5              | inf                | 174         | 0           |
| TG                  | -inf               | inf                | 0           | 0           |
| RO60 KO             |                    |                    |             |             |
| AC                  | -inf               | inf                | 0           | 0           |
| AG                  | -inf               | 16.6               | 0           | 114         |
| AT                  | -inf               | inf                | 0           | 0           |
| CA                  | -inf               | inf                | 0           | 0           |
| CG                  | -inf               | inf                | 0           | 0           |
| CT                  | -inf               | inf                | 0           | 0           |
| GA                  | -inf               | inf                | 0           | 0           |
| GC                  | -inf               | inf                | 0           | 0           |
| GT                  | -inf               | inf                | 0           | 0           |
| TA                  | -inf               | inf                | 0           | 0           |
| TC                  | -inf               | inf                | 0           | 0           |
| TG                  | -inf               | inf                | 0           | 0           |
| MYCN-amp            |                    |                    |             |             |
| AC                  | -inf               | inf                | 0           | 0           |
| AG                  | -inf               | 30.4               | 0           | 271         |
| AT                  | -inf               | inf                | 0           | 0           |
| CA                  | -inf               | inf                | 0           | 0           |
| CG                  | -inf               | inf                | 0           | 0           |
| CT                  | -inf               | inf                | 0           | 0           |
| GA                  | -48.2              | inf                | 37          | 0           |
| GC                  | -inf               | inf                | 0           | 0           |
| GT                  | -inf               | inf                | 0           | 0           |
| TA                  | -inf               | inf                | 0           | 0           |
| TC                  | -inf               | inf                | 0           | 0           |
| TG                  | -inf               | inf                | 0           | 0           |
| <i>sncRNA7SL</i> OE |                    |                    |             |             |
| AC                  | -inf               | inf                | 0           | 0           |
| AG                  | -23.2              | inf                | 64          | 0           |
| AT                  | -inf               | inf                | 0           | 0           |
| CA                  | -inf               | inf                | 0           | 0           |
| CG                  | -inf               | inf                | 0           | 0           |
| CT                  | -inf               | inf                | 0           | 0           |
| GA                  | -inf               | inf                | 0           | 0           |
| GC                  | -21.3              | 25.6               | 108         | 76          |
| GT                  | -inf               | inf                | 0           | 0           |
| TA                  | -inf               | inf                | 0           | 0           |
| TC                  | -inf               | inf                | 0           | 0           |
| TG                  | -inf               | inf                | 0           | 0           |

**Supplementary Table 1: LoDEI results for all possible mismatches for all analyzed datasets:** Shown are the signal cutoffs corresponding to a  $q$  value  $\leq 0.1$  and the number of found windows for negative and positive  $\delta^{A \rightarrow G}$  values. In cases of -inf or inf no signals with a  $q$  value  $\leq 0.1$  are found.



| baseMean         | log2FC | adj. p-value            | gene  |
|------------------|--------|-------------------------|-------|
| ADAR KD          |        |                         |       |
| 3388.72          | -2.48  | $1.71 \times 10^{-239}$ | ADAR  |
| 341.91           | -0.90  | $4.68 \times 10^{-8}$   | ADAR2 |
| 1.45             | 0.87   | 0.77                    | ADAR3 |
| RO60 KO          |        |                         |       |
| 13800.97         | 0.08   | 0.81                    | ADAR  |
| 245.34           | 1.88   | $2.84 \times 10^{-9}$   | ADAR2 |
| 232.35           | 1.15   | 0.27                    | ADAR3 |
| MYCN-amp         |        |                         |       |
| 11135.97         | -0.68  | 0.16                    | ADAR  |
| 1123.13          | -1.93  | 0.009                   | ADAR2 |
| 27.85            | 2.17   | 0.43                    | ADAR3 |
| <i>sncRNA7SL</i> |        |                         |       |
| 17132.67         | -0.06  | 0.23                    | ADAR  |
| 1365.72          | -0.17  | 0.02                    | ADAR2 |
| 3.15             | 0.12   | 0.94                    | ADAR3 |

**Supplementary Table 2: DESeq2 results for genes of the ADAR family:** DESeq2 was run with default parameters testing for log2 fold changes being equal to zero. By default, DESeq2 adjusts derived p-values via the Benjamini-Hochberg method.

103 **References**

- 104 [1] Boaz Goldstein, Lily Agranat-Tamir, Dean Light, Orna Ben-Naim Zgayer, Alla Fish-  
105 man, and Ayelet T. Lamm. A-to-I RNA editing promotes developmental stage-  
106 specific gene and lncRNA expression. *Genome Research*, 27(3):462–470, December  
107 2016.
- 108 [2] Alexander Lex, Nils Gehlenborg, Hendrik Strobelt, Romain Vuillemot, and  
109 Hanspeter Pfister. UpSet: Visualization of Intersecting Sets. *IEEE Transactions*  
110 *on Visualization and Computer Graphics (InfoVis)*, 20(12):1983–1992, 2014.
